# Supplementary material
Source: bioRxiv or medRxiv preprint supplement (http://medrxiv.org/highwire/filestream/72306/field_highwire_adjunct_files/0/2020.02.18.20024448-1.pdf)

### Supplementary materials

**Table S1.** Engagement in avoidance and recommended behaviors due to the novel coronavirus outbreak

|                                               | Wuhan<br>(N=510)<br>N(%) | Shanghai<br>(N=501)<br>N(%) | P-value |
|-----------------------------------------------|--------------------------|-----------------------------|---------|
| Last week, I have ... because of the outbreak |                          |                             |         |
| Avoided eating out                            | 488 (95.7)               | 487 (97.2)                  | 0.193   |
| Avoided using public transport                | 487 (95.5)               | 467 (93.2)                  | 0.117   |
| Reduced going to public areas                 | 479 (93.9)               | 479 (95.6)                  | 0.229   |
| Rescheduled travel plan                       | 468 (91.8)               | 451 (90.0)                  | 0.335   |
| Increased surface cleaning                    | 456 (89.4)               | 390 (77.8)                  | <0.001  |
| Maintained better indoor ventilation          | 499 (97.8)               | 488 (97.4)                  | 0.648   |

**Table S2.** Perceived severity compared with SARS by age groups

|                             | Wuhan                 |                                 | P-value | Shanghai              |                                 | P-value |
|-----------------------------|-----------------------|---------------------------------|---------|-----------------------|---------------------------------|---------|
|                             | Aged 18-39<br>(N=250) | Aged 40<br>and above<br>(N=260) |         | Aged 18-39<br>(N=251) | Aged 40<br>and above<br>(N=250) |         |
|                             | N (%)                 | N (%)                           |         | N (%)                 | N (%)                           |         |
| Severity compared with SARS |                       |                                 | 0.136   |                       | <0.001                          |         |
| Much lower                  | 6 (2.4)               | 7 (2.7)                         |         | 8 (3.2)               | 4 (1.6)                         |         |
| Lower                       | 25 (10.0)             | 41 (15.8)                       |         | 52 (20.7)             | 23 (9.2)                        |         |
| Even                        | 75 (30.0)             | 56 (21.5)                       |         | 81 (32.3)             | 55 (22.0)                       |         |
| Higher                      | 76 (30.4)             | 82 (31.5)                       |         | 50 (19.9)             | 77 (30.8)                       |         |
| Much higher                 | 68 (27.2)             | 74 (28.5)                       |         | 60 (23.9)             | 91 (36.4)                       |         |

**Table S3.** Perception variables associated with face mask wearing and hands washing, odds ratios (95% CI)

|                                             | Increased frequency in... |                       | Longer handwashing duration | Purchased goggles   |
|---------------------------------------------|---------------------------|-----------------------|-----------------------------|---------------------|
|                                             | Face mask wearing         | Immediate handwashing |                             |                     |
| GAD score (continuous)                      | 1.0<br>(0.9 - 1.0)        | 1.0<br>(1.0 - 1.0)    | 1.0<br>(1.0 - 1.0)          | 1.0<br>(1.0 - 1.0)  |
| Correct perceived efficacy                  | 1.4<br>(0.5 - 4.0)        | 1.9**<br>(1.2 - 3.2)  | 1.2<br>(0.8 - 1.7)          | 1.2<br>(0.8 - 1.8)  |
| Perceived risk                              | 0.9<br>(0.7 - 1.3)        | 1.0<br>(0.9 - 1.3)    | 1.2**<br>(1.1 - 1.4)        | 1.1<br>(0.9 - 1.3)  |
| Perceived severity                          | 0.8<br>(0.6 - 1.0)        | 0.8<br>(0.7 - 1.0)    | 0.8*<br>(0.7 - 1.0)         | 1.1<br>(0.9 - 1.3)  |
| Relative transmissibility to SARS (in 2003) | 1.2<br>(0.8 - 2.0)        | 1.3*<br>(1.0 - 1.7)   | 1.3**<br>(1.1 - 1.6)        | 1.0<br>(0.8 - 1.1)  |
| Relative harm to body to SARS (in 2003)     | 1.1<br>(0.8 - 1.4)        | 0.8*<br>(0.7 - 1.0)   | 1.0<br>(0.9 - 1.2)          | 1.2*<br>(1.0 - 1.4) |
| Received and read information brochure      | 1.3<br>(0.5 - 3.4)        | 3.2**<br>(1.4 - 7.1)  | 1.2<br>(0.7 - 1.9)          | 0.9<br>(0.5 - 1.5)  |
| Sufficient information                      | 1.2<br>(0.8 - 1.9)        | 1.1<br>(0.9 - 1.4)    | 1.2*<br>(1.0 - 1.4)         | 0.9<br>(0.8 - 1.1)  |
| Confused about information reliability      | 1.1<br>(0.8 - 1.4)        | 1.0<br>(0.8 - 1.2)    | 1.1<br>(0.9 - 1.2)          | 1.0<br>(0.9 - 1.2)  |
| Self-confidence                             | 1.0<br>(0.6 - 1.6)        | 1.2<br>(0.9 - 1.6)    | 1.0<br>(0.8 - 1.1)          | 1.0<br>(0.8 - 1.2)  |

Notes: Each column presents a separate multivariate logistic regression result. \* for significance at the 5% level; \*\* for significance at the 1% level.

**Table S4.** Perceived efficacy of various behaviors

|                                                                        | Wuhan<br>N (%) | Shanghai<br>N (%) | P-value |
|------------------------------------------------------------------------|----------------|-------------------|---------|
| Washing hands more frequently                                          |                |                   | 0.274   |
| Effective                                                              | 435 (85.5)     | 414 (82.6)        |         |
| Even                                                                   | 71 (13.9)      | 80 (16.0)         |         |
| Ineffective                                                            | 3 (0.6)        | 7 (1.4)           |         |
| Wearing a face mask                                                    |                |                   | 0.314   |
| Effective                                                              | 471 (92.5)     | 450 (89.8)        |         |
| Even                                                                   | 35 (6.9)       | 47 (9.4)          |         |
| Ineffective                                                            | 3 (0.6)        | 4 (0.8)           |         |
| Reducing going out                                                     |                |                   | 0.547   |
| Effective                                                              | 491 (96.5)     | 481 (96.0)        |         |
| Even                                                                   | 14 (2.8)       | 18 (3.6)          |         |
| Ineffective                                                            | 4 (0.8)        | 2 (0.4)           |         |
| Washing mouth with salty water                                         |                |                   | <0.001  |
| Effective                                                              | 153 (30.1)     | 124 (24.8)        |         |
| Even                                                                   | 231 (45.4)     | 187 (37.3)        |         |
| Ineffective                                                            | 125 (24.6)     | 190 (37.9)        |         |
| Having vitamin C or radix isatidis<br>(a traditional Chinese medicine) |                |                   | 0.002   |
| Effective                                                              | 81 (15.9)      | 89 (17.8)         |         |
| Even                                                                   | 256 (50.3)     | 198 (39.5)        |         |
| Ineffective                                                            | 172 (33.8)     | 214 (42.7)        |         |

**Figure S1.** Participant recruitment flowcharts

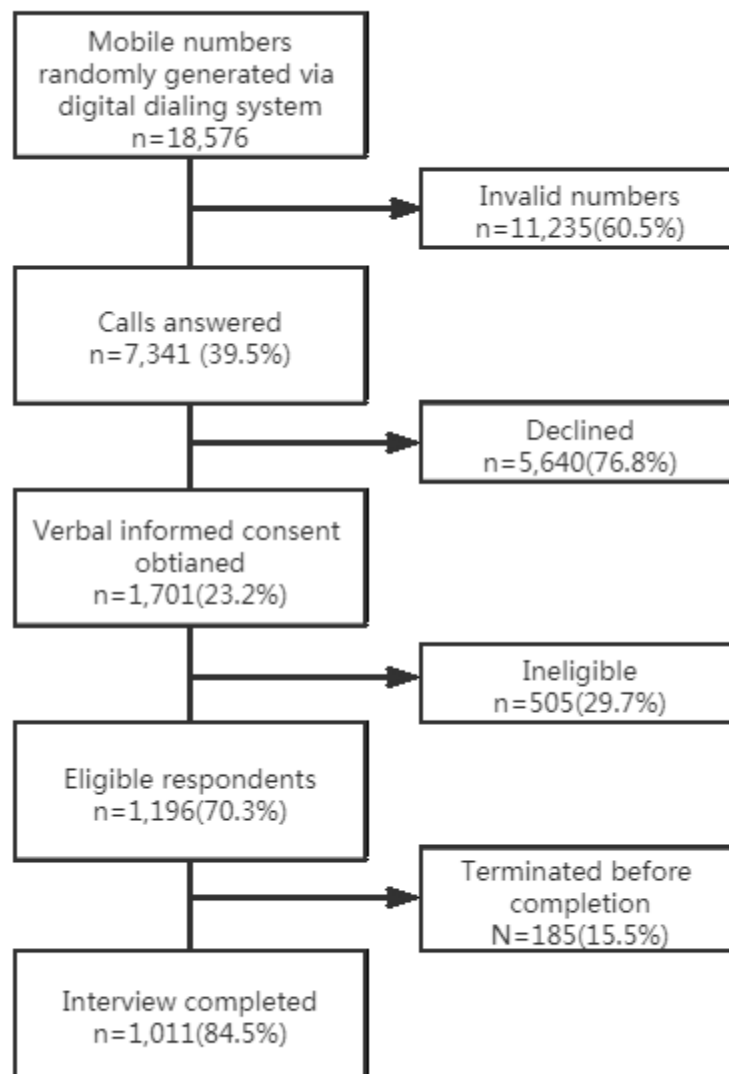

**Figure S2.** Top reasons for wearing a face mask and not always wearing in the past week

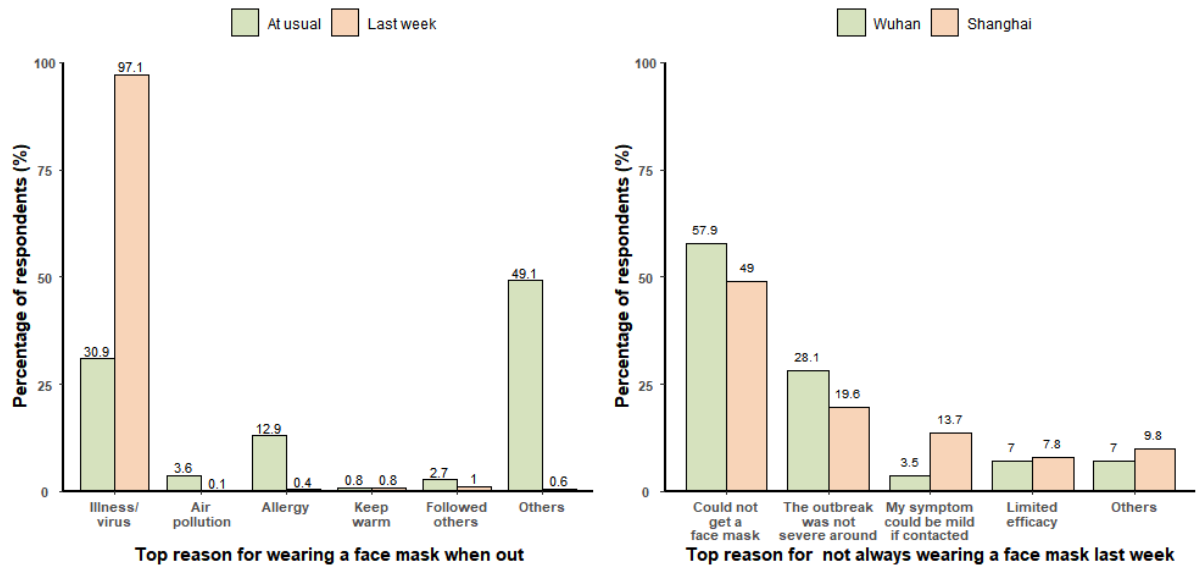

Supplement: Supplementary file [file 2020.02.18.20024448-1.pdf]
